# Supplementary material
Source: PubMed Central journal article supplement (PMC5182091)

Supplementary Figure 5 (Daley)

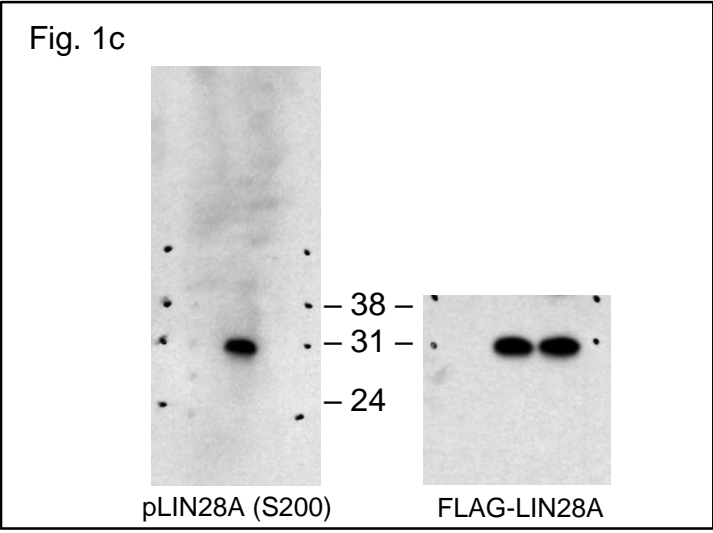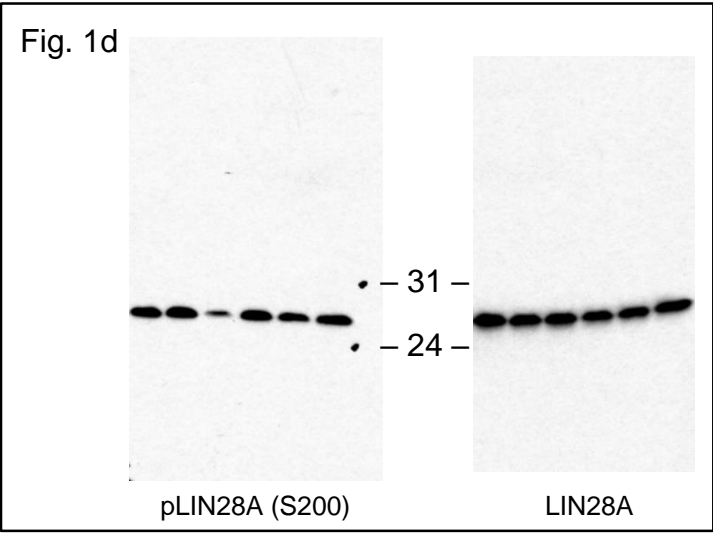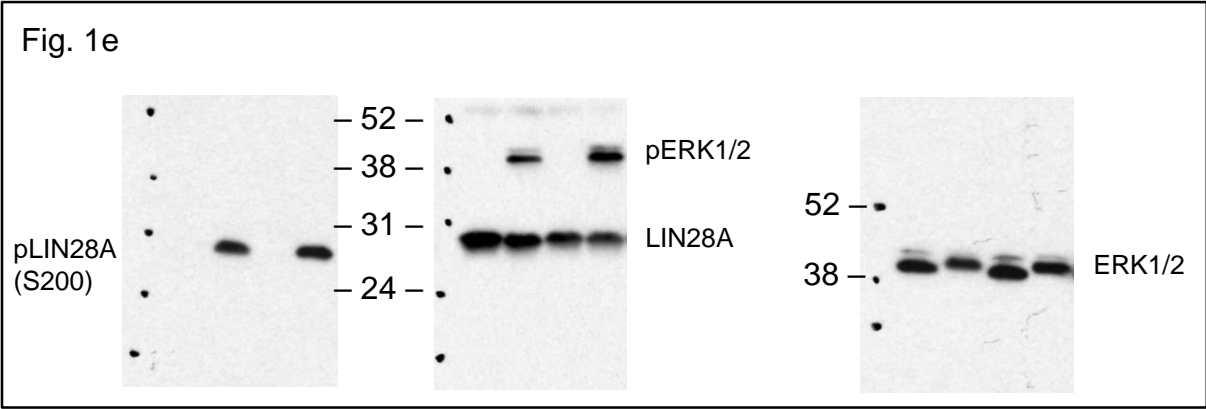

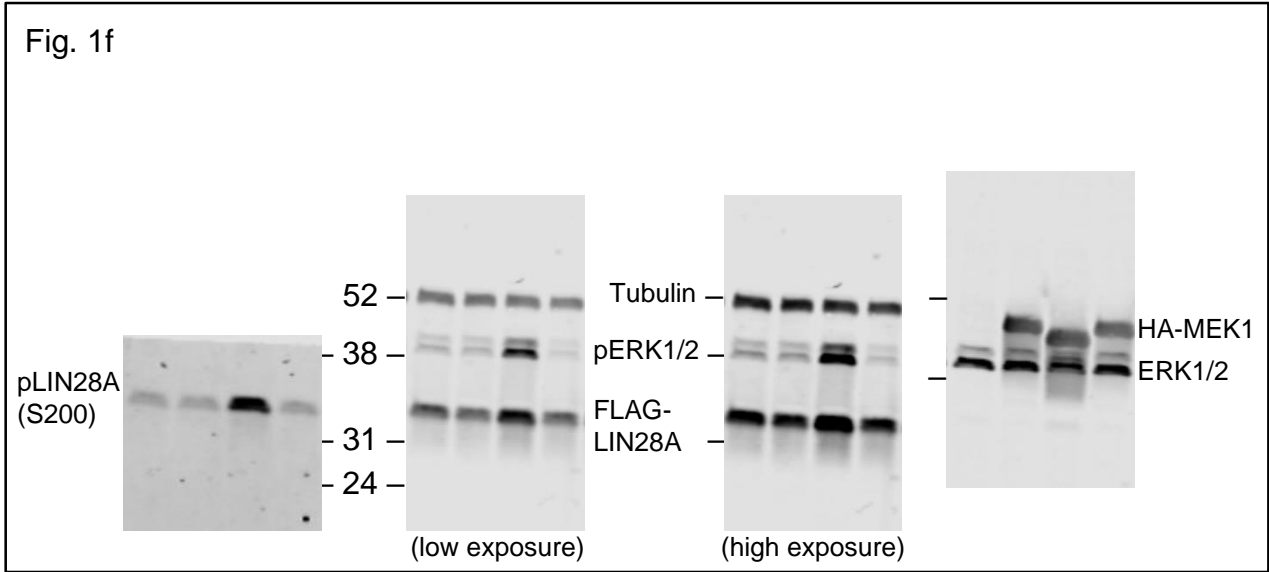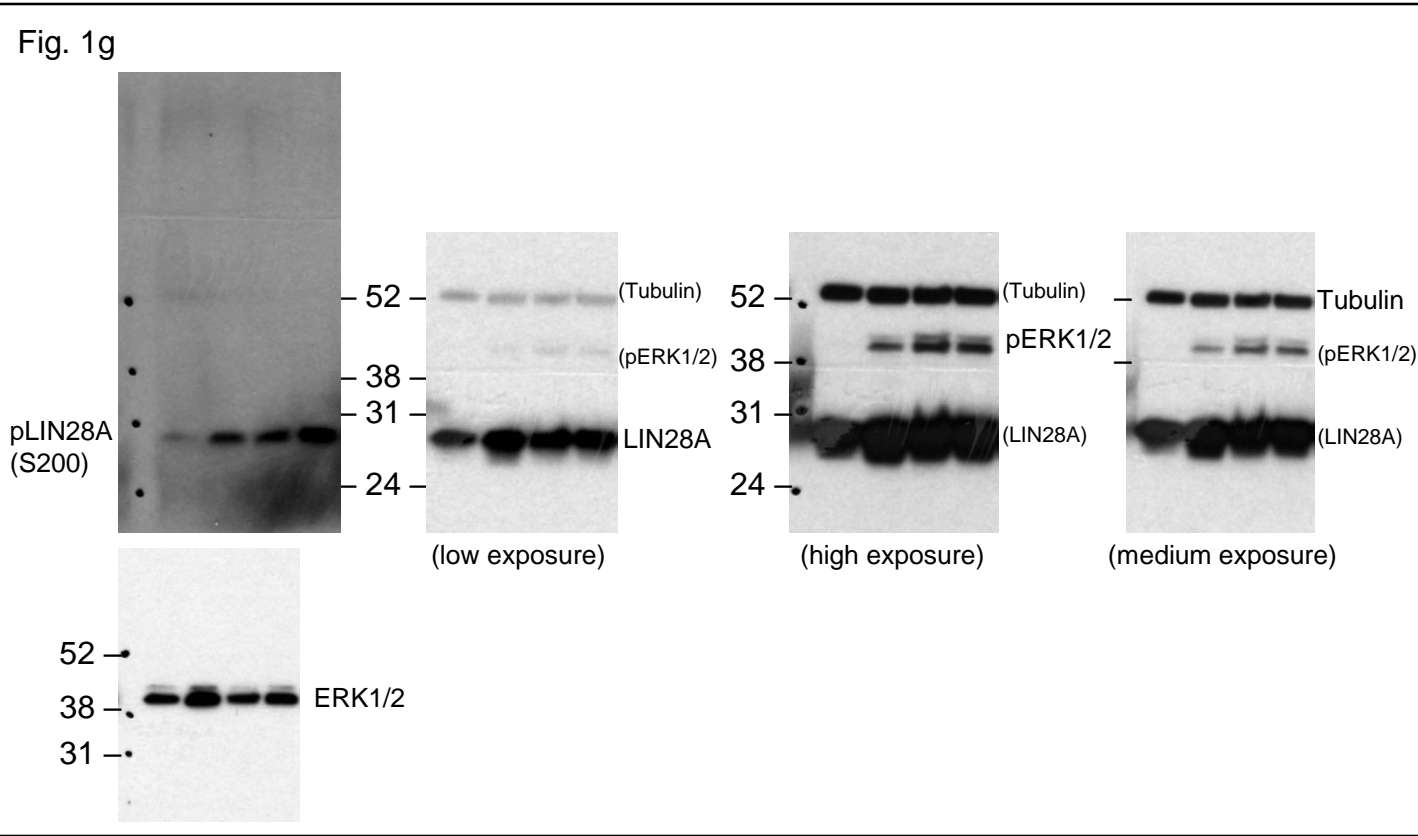

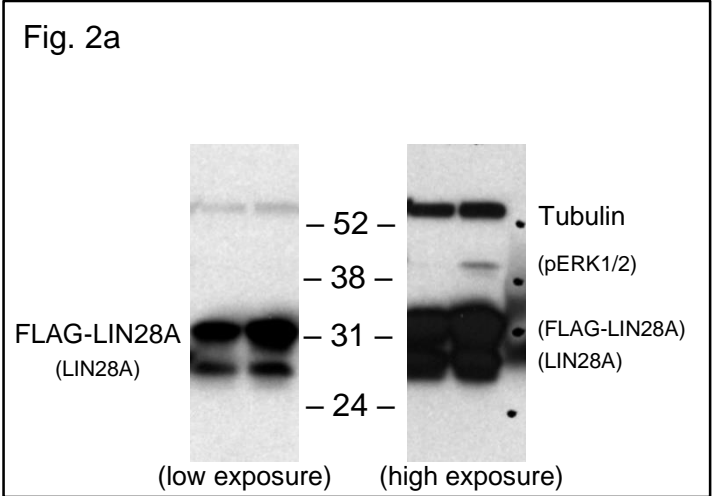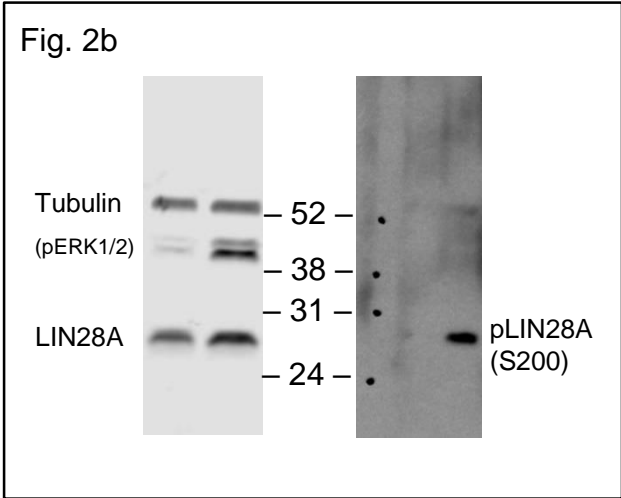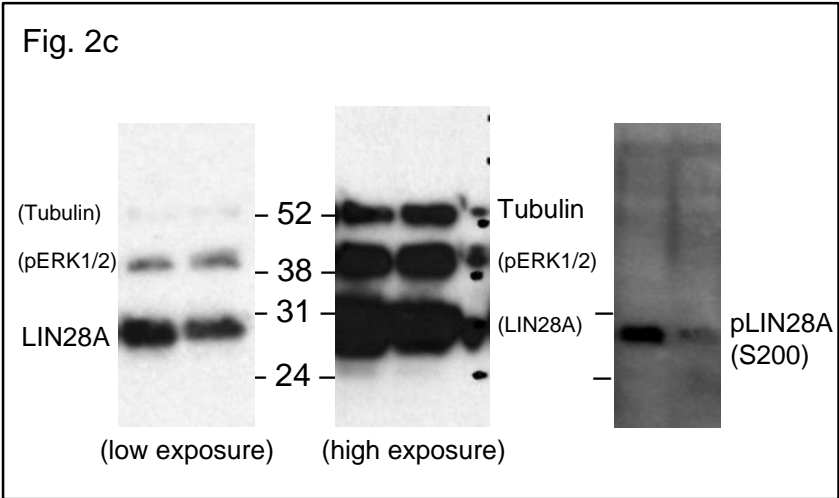

Supplementary Figure 5 (Daley) [continued]

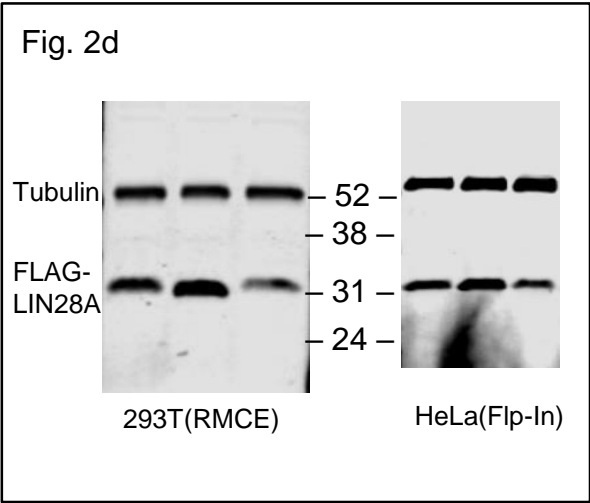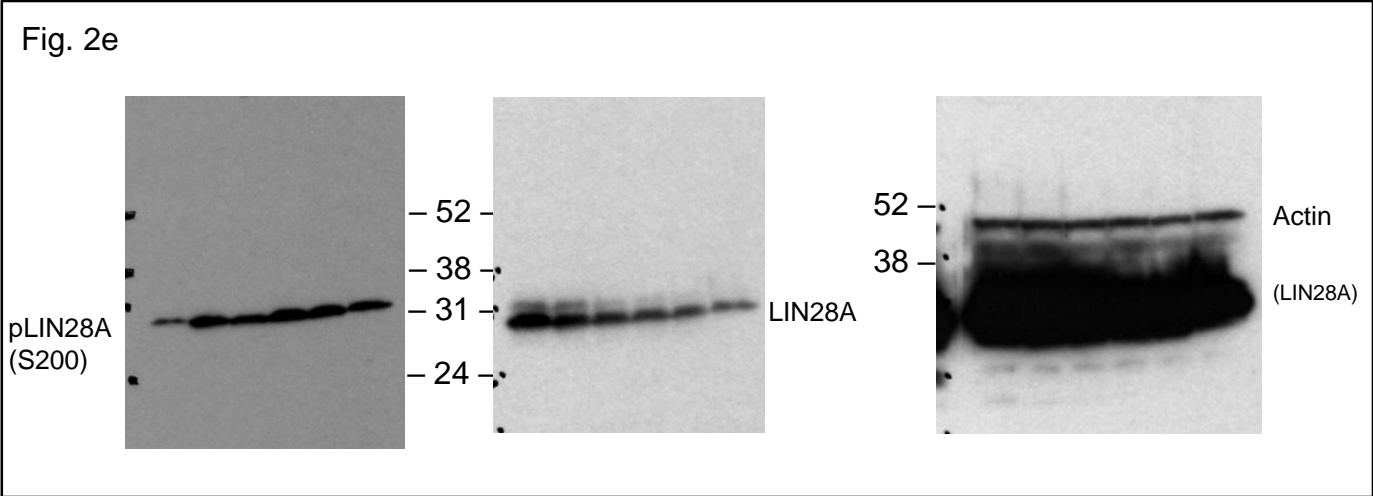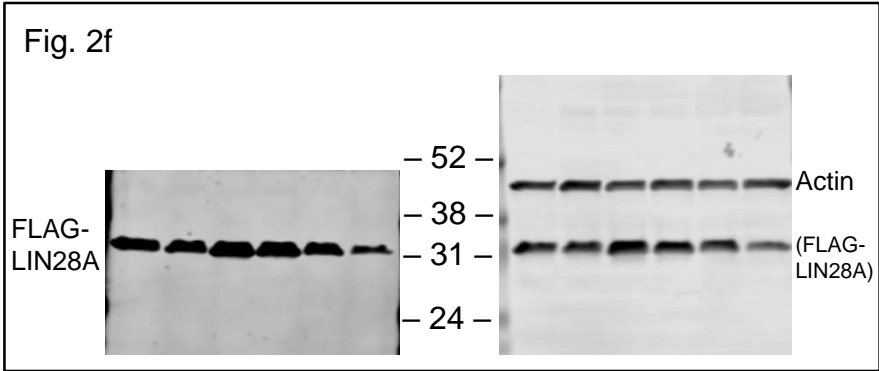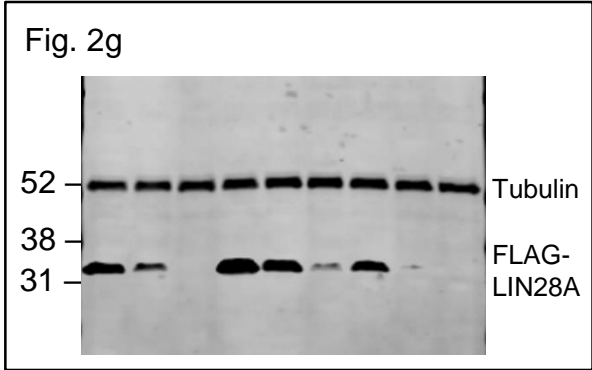

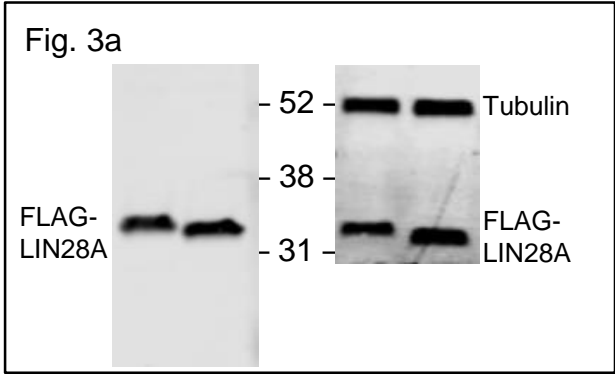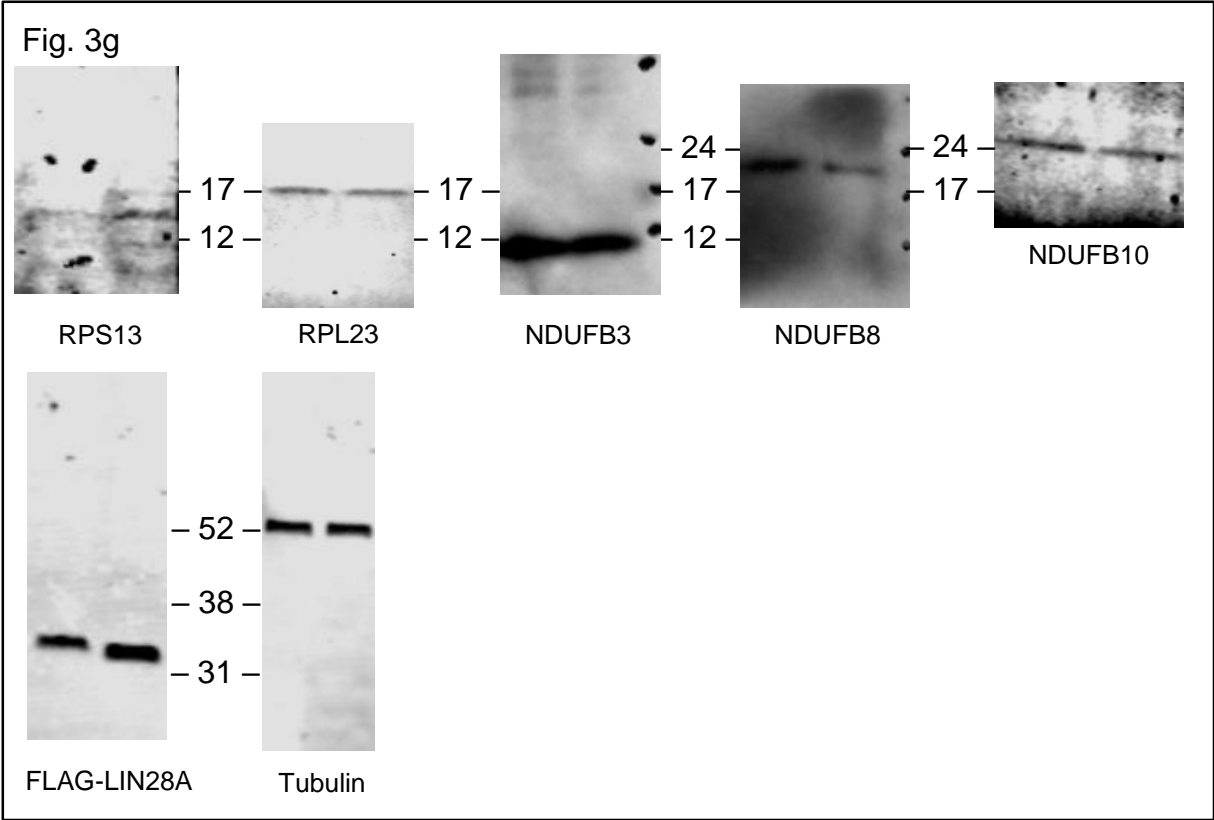

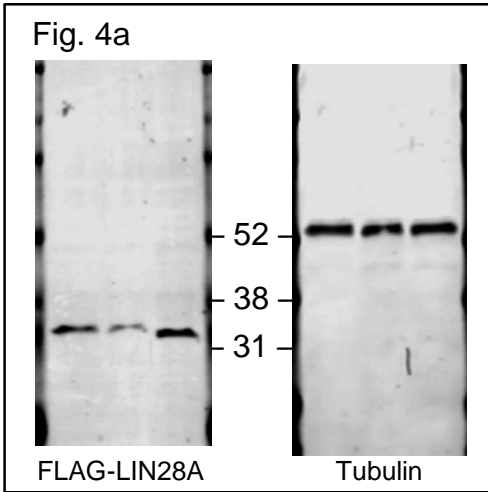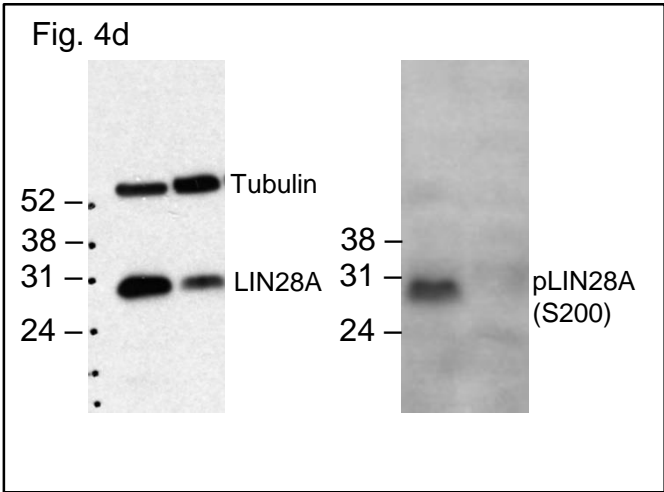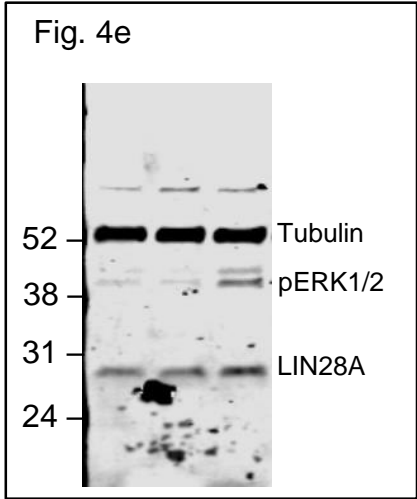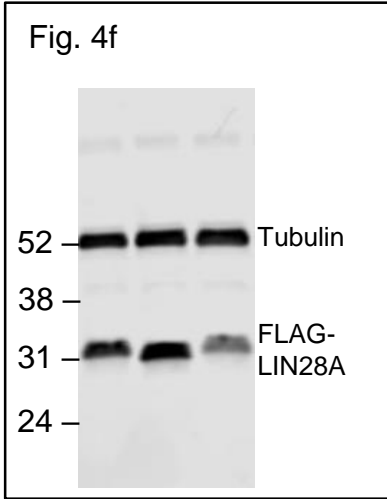

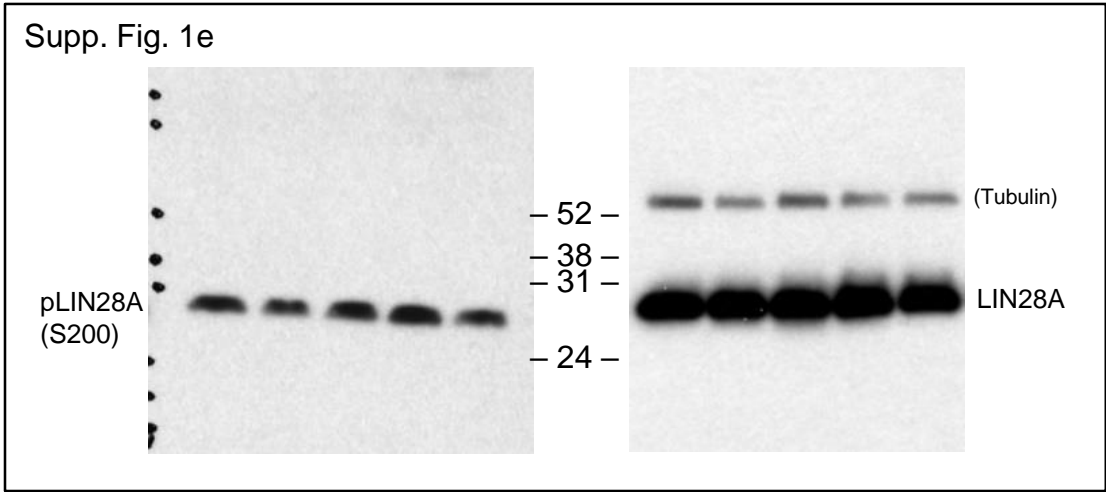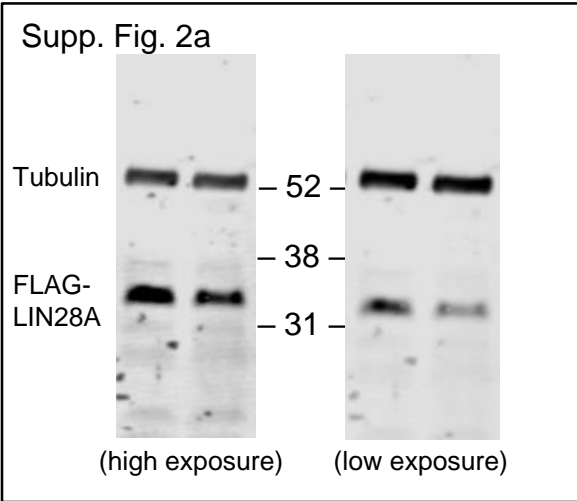

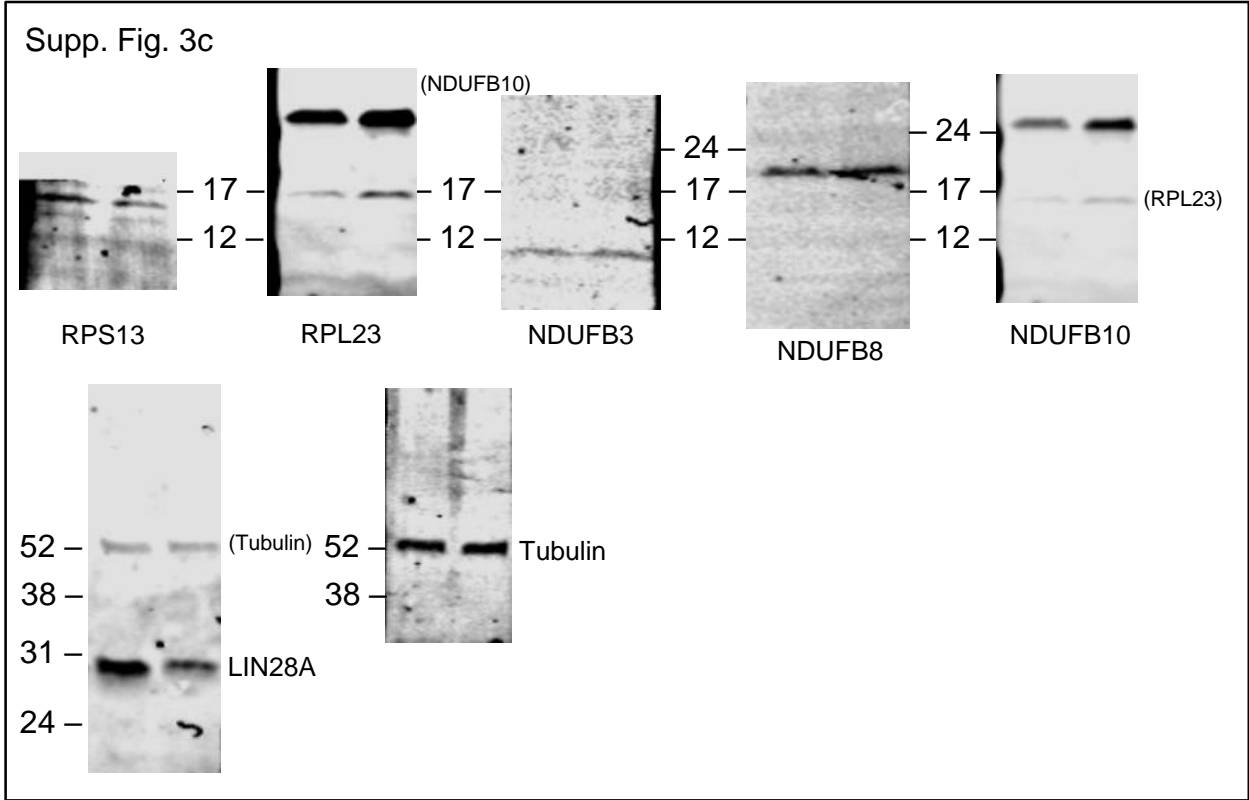



Supplementary Figure 5 (Daley) [continued]

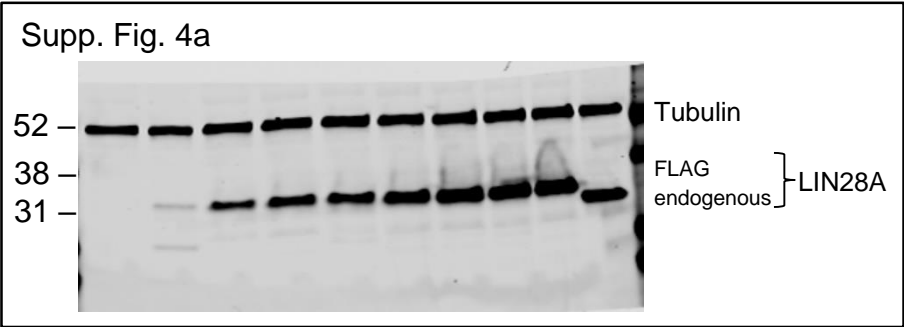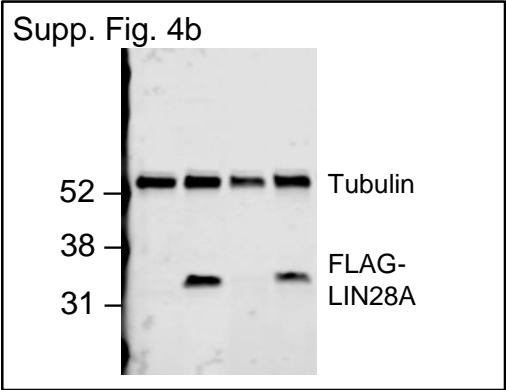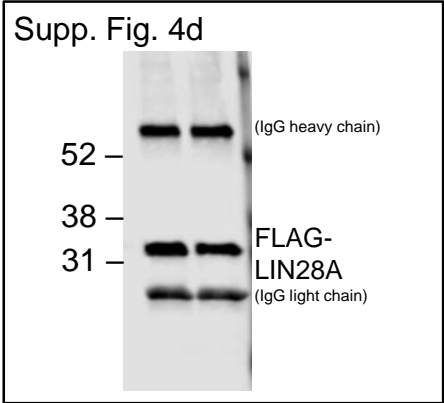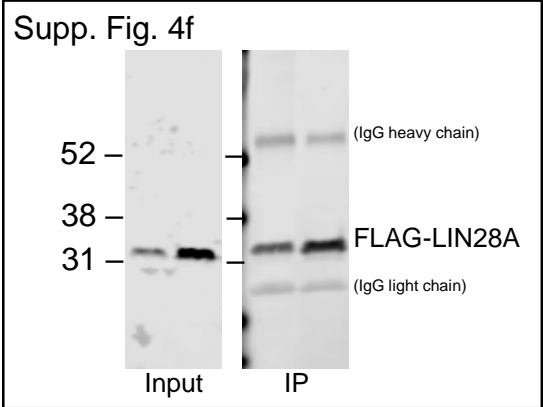

Supplement: NIHMS830329-supplement-6.pdf [file NIHMS830329-supplement-6.pdf]
