# Supplementary material
Source: PubMed Central journal article supplement (PMC5182091)

# Supplementary Figure 1 (Daley)

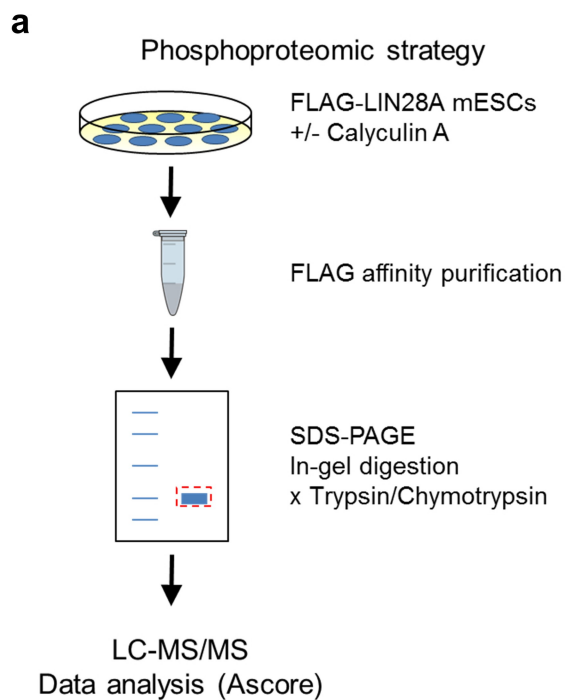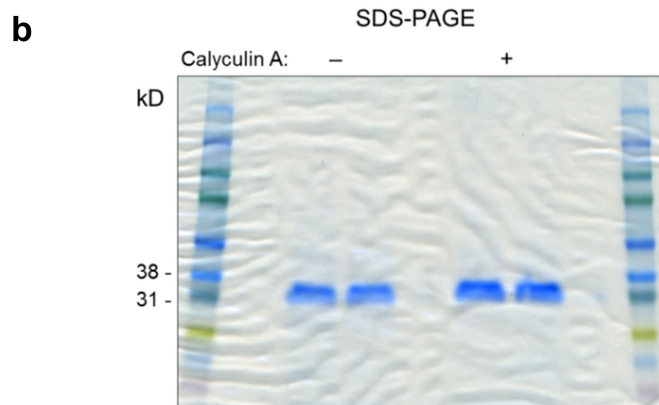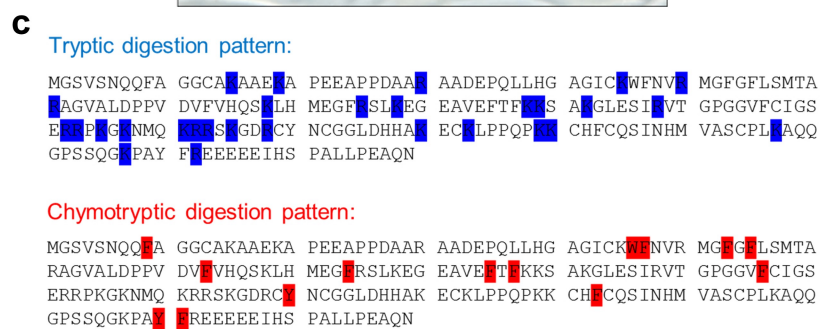

**d**

| Site | Motif       | Kinase Predictions (ScanSite 3)         |
|------|-------------|-----------------------------------------|
| S3   | ---MGSVSNQQ | n/a                                     |
| S5   | -MGSVSNQQFA | n/a                                     |
| S120 | VFCIGSERRPK | PRKCA/B/G                               |
| S183 | AQQGPSAQGKP | n/a                                     |
| S200 | EEEIHSPTLLP | MAPK3; CDK5; CDC2;<br>CDK1; GSK3A; CLK2 |
| T202 | EIHSPDLLPEA | PRKACG                                  |

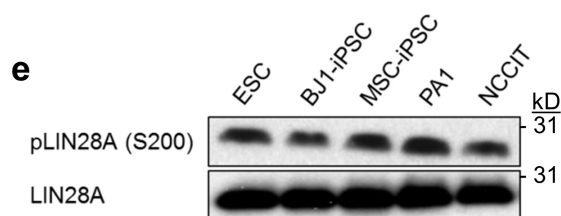

Supplement: NIHMS830329-supplement-2.pdf [file NIHMS830329-supplement-2.pdf]
