# Supplementary material
Source: PubMed Central journal article supplement (PMC5182091)

# Supplementary Figure 2 (Daley)

**a**

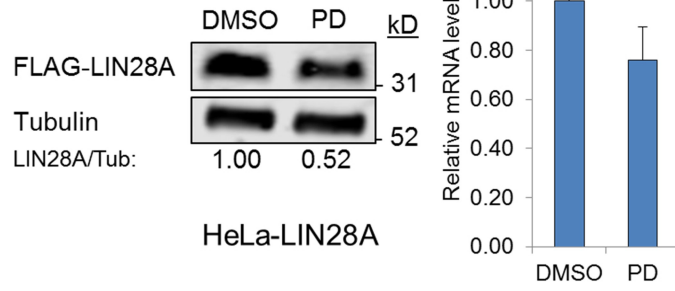

**b**

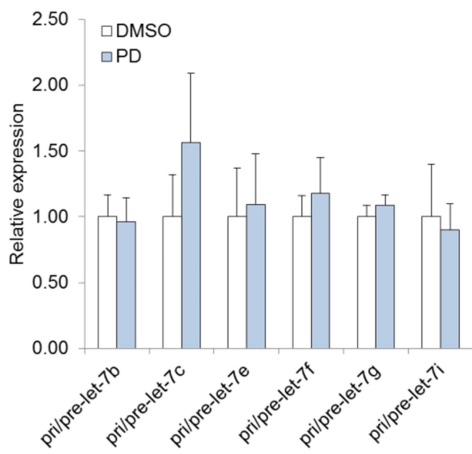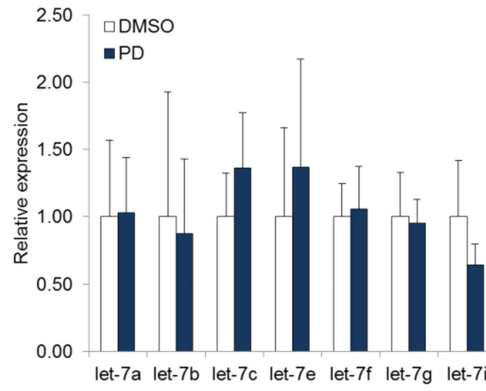

Supplement: NIHMS830329-supplement-3.pdf [file NIHMS830329-supplement-3.pdf]

# Supplementary Figure 3 (Daley)

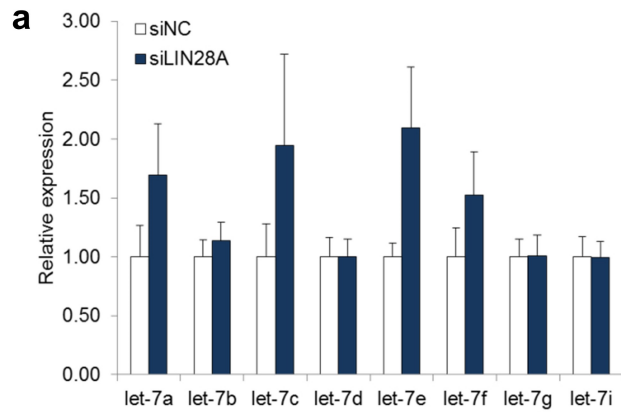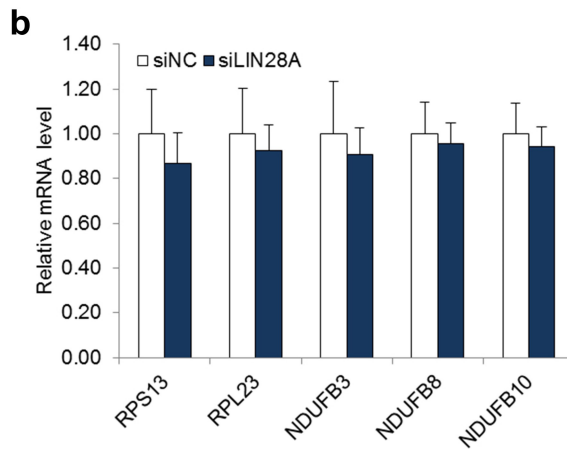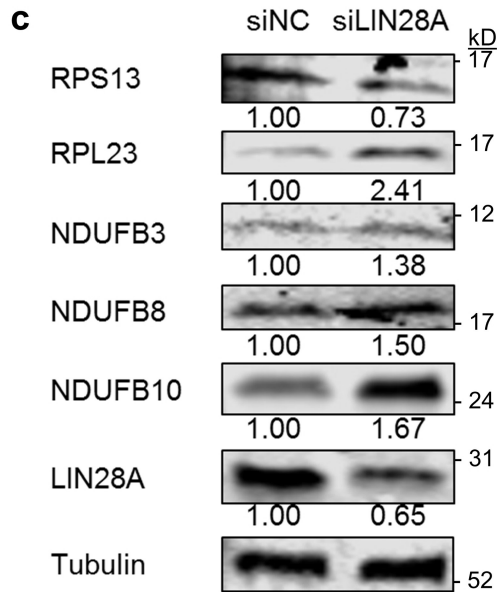

Supplement: NIHMS830329-supplement-4.pdf [file NIHMS830329-supplement-4.pdf]

# Supplementary Figure 4 (Daley)

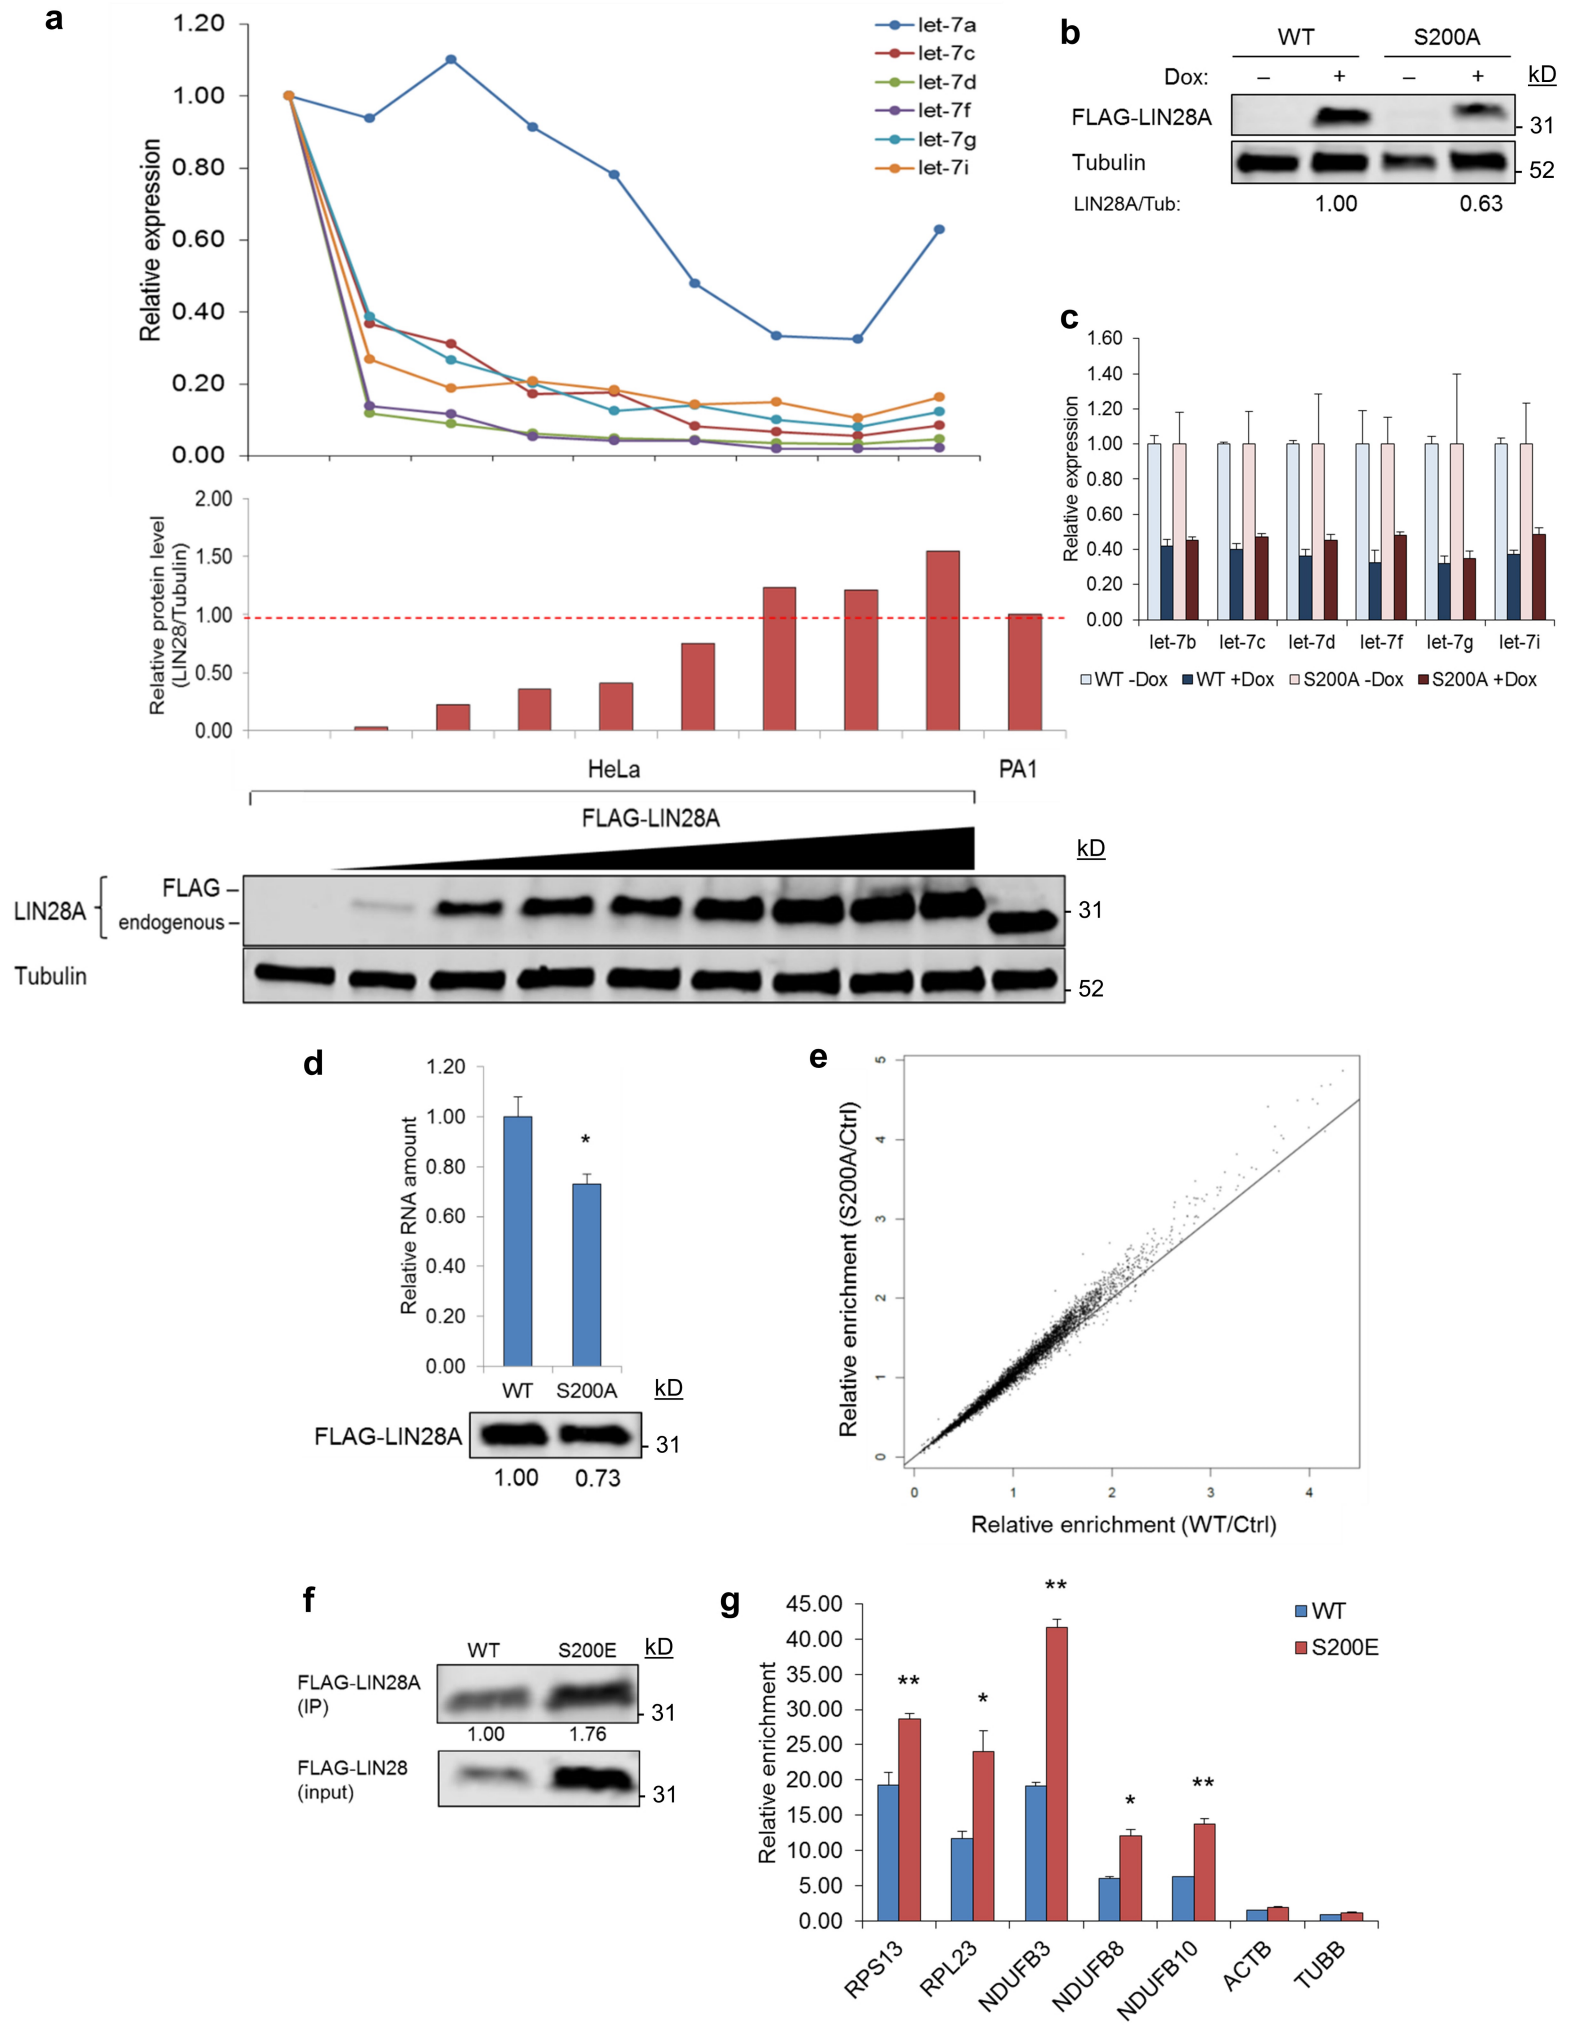

Supplement: NIHMS830329-supplement-5.pdf [file NIHMS830329-supplement-5.pdf]
